# Supplementary material
Source: PubMed Central journal article supplement (PMC2666554)
Supplement: M809608200_1.pdf [file M809608200_1.pdf]

## Supplemental Data

|            |                                                                                                                                |
|------------|--------------------------------------------------------------------------------------------------------------------------------|
| GGT1_HUMAN | MKK <u>KL</u> VVLGLLAVVVLVIVGLCLWLPS <u>ASK</u> <u>E</u> PDNHVYTRAAVAADAK <u>QCSK</u> IGRDALRD                                 |
| GGT1_RAT   | MKNRFLVVLGVLAVVVLVFVVIIGLCIWLPTTSG-KPDHVYSRAAVATDAKRCSEIGRDMLQE                                                                |
| GGT1_MOUSE | MKNRFLVVLGVLAVVVLVFVVIIGLCIWLPTTSG-KPDHVYSRAAVATDAKRCSEIGRDILQE                                                                |
| GGT1_PIG   | MKKRYLLLALAAVALVLLIILGLCLWLPSNSK-PHNHVYPRAAVAADALRCSEIGRDTLRD                                                                  |
| GGT1_HUMAN | GGSAVDAAIAALLCVGLMNAHSMGIGGGLFLTIIYNSTTRKAEVINAREVAPRLAFATMFN                                                                  |
| GGT1_RAT   | GGSVVDAAIASLLCMGLINAHSMGIGGGLFFTIIYNSTTRKAEVINAREMAPRLANTSMFN                                                                  |
| GGT1_MOUSE | GGSVVDAAIASLLCMGLMNAHSMGIGGGLFFTIIYNSTTGKVEVINAREVAPRLANTTFMN                                                                  |
| GGT1_PIG   | GGSAVDAAIAALLCVGLMNAHSMGIGGGLFLTIIYNSTTRKAEIINAREVAPRLASASMFN                                                                  |
| GGT1_HUMAN | SSEQS <u>QK</u> GGLSVAVPGEIRGYELAHQRHGRLPWARLFQPSIQLARQGFVPGKGLAAALEN                                                          |
| GGT1_RAT   | NSKDSEEGGLSVAVPGEIRGYELAHQRHGRLPWARLFQPSIQLARHGFPVPGKGLARALDK                                                                  |
| GGT1_MOUSE | NSKDSEEGGLSVAVPGEIRGYELAHQRHGRLPWARLFQPSIQLARHGFPVPGKGLAIALDK                                                                  |
| GGT1_PIG   | SSEQSEEGGLSVAVPGEIRGYELAHQRHGRLPWARLFQPSIELASQGFVPGKGLAAALER                                                                   |
| GGT1_HUMAN | KRTVIEQQ <u>PV</u> LCEVFCRDR <u>KV</u> LREGER <u>LTL</u> PQLADTYETLAIEGAQAFYNGSLTAQIVKD                                        |
| GGT1_RAT   | KRDIIEKTPALCEVFCRQGGKVLQEGETVTMPKLADTLQILAQEGARAFYNGSLTAQIVKD                                                                  |
| GGT1_MOUSE | KRDVIEKTPALCEVFCRQGGKVLQEGETVTMPKLADTLQILAQEGAKAFYNGSLTAQIVKD                                                                  |
| GGT1_PIG   | SQDAIKRHPALCEVFCRNGNVLREGDLVTMPRLAKTYETLAVEGAQAFYNGSLTAQIVKD                                                                   |
| GGT1_HUMAN | IQ <u>A</u> AGGIVTAEDLN <sup>Y</sup> RAELIEHPLN <sup>I</sup> SLGDV <sup>V</sup> LYMPSAPLSGPVLALILN <sup>I</sup> LKGYNFSR       |
| GGT1_RAT   | IQEAGGIMTVEDLN <sup>Y</sup> RAEVIIEHPMSIGLGDSTLYVPSAPLSGPVLILILN <sup>I</sup> LKGYNFSR                                         |
| GGT1_MOUSE | IQEAGGIMTVEDLN <sup>Y</sup> RAELIEHPMSIGLGDATLYVPSAPLSGPVLILILN <sup>I</sup> LKGYNFSR                                          |
| GGT1_PIG   | IQEAGGIVTAEDLN <sup>Y</sup> RAELIEQPLRISLGDAQLYAPNAPLSGPVLALILN <sup>I</sup> LKGYNFSR                                          |
| GGT1_HUMAN | <u>E</u> SVE <u>S</u> PEQKGLTYHRIVEAFRFAYAKRTLLGDPKFVDVTEVVRNM <u>T</u> SEFFAAQLRA <u>Q</u> ISD                                |
| GGT1_RAT   | KSVATPEQKALTYHRIVEAFRFAYAKRTMLGDPKFVDVSVQVIRNMSSEFYATQLRARITD                                                                  |
| GGT1_MOUSE | KSVATPEQKALTYHRIVEAFRFAYAKRTMLGDPKFVDVSVQVIRNMSSEFYATQLRARITD                                                                  |
| GGT1_PIG   | ASVETPEQKGLTYHRIVEAFRFAYAKRTLLGDPKFVNVTEVVRNMSSEFFADQLRARISD                                                                   |
|            | ↓                                                                                                                              |
| GGT1_HUMAN | <u>D</u> TTHPI <u>S</u> Y <u>YK</u> PEFYTPDDGGTAHLSV <u>V</u> AEDGS <sup>A</sup> VSATSTINLYFGSKVRS <u>P</u> VSGILFN <u>N</u> E |
| GGT1_RAT   | ETTHPTAYYEPEFYLPDDGGTAHLSV <u>V</u> SE <sup>D</sup> GS <sup>A</sup> VAAATSTINLYFGSKVLSRVSGILFNDE                               |
| GGT1_MOUSE | ETTHPAAYYEPEFYLQDDGGTAHLSAVSE <sup>D</sup> GS <sup>A</sup> VAAATSTINLYFGSKVLSRVSGILFNDE                                        |
| GGT1_PIG   | TTTHPDSYYEPEFYTPDDAGTAHLSV <u>V</u> SDDGS <sup>A</sup> VSATSTINLYFGSKVRSRISGILFNDE                                             |
| GGT1_HUMAN | MDDFSSP <u>S</u> IT <u>N</u> EFGVPPSPANFIQPGKQPLSSMCPT <u>I</u> MVGQDGQVRMVVGA <u>AG</u> GTQIT <u>T</u> A                      |
| GGT1_RAT   | MDDFSSPNFTNQFGVAPSPANFIKPGKQPLSSMCPSIIVDKDGKVRMVVGASGGTQITTS                                                                   |
| GGT1_MOUSE | MDDFSSPNFINQFRVAPSPANFIKPGKQPLSSMCPSIILDKDGQVRMVVGASGGTQITTS                                                                   |
| GGT1_PIG   | MDDFSSPNITNQFGVRPSPANFITPGKQPLSSMCPVIVGEDGQVRMVVGASGGTQITTS                                                                    |
| GGT1_HUMAN | TALAI <u>I</u> Y <u>N</u> LWFGYDVKRAVEE <u>P</u> RLHNQLLPN <u>V</u> TTVERNIDQAVTAAL <u>E</u> TRHHHTQI <u>A</u> STF             |
| GGT1_RAT   | VALAIINSLWFGYDVKRAVEE <u>P</u> RLHNQLLPN <u>T</u> TTTVEKNIDQVVTAGLKTRHHHTVTPDF                                                 |
| GGT1_MOUSE | VALAIINSLWFGYDVKRAVEE <u>P</u> RLHNQLLPN <u>T</u> TTTVEKDIDQVVTAGLKIRHHHTVTPTF                                                 |
| GGT1_PIG   | TALAIIHSLWFGYDVKRAVEE <u>P</u> RLHNQLLPN <u>T</u> TTTLEKIDQAVAAALKTRHHYIQDASTF                                                 |
| GGT1_HUMAN | I <u>A</u> VVQAIVRT <u>A</u> GGWAAASDSRKGGE <u>P</u> AGY                                                                       |
| GGT1_RAT   | I <u>A</u> VVQAVVRT <u>S</u> GGWAAASDSRKGGE <u>P</u> AGY                                                                       |
| GGT1_MOUSE | I <u>A</u> VVQAVVRASGGWAAASDSRKGGE <u>P</u> AGY                                                                                |
| GGT1_PIG   | I <u>G</u> VVQAIVRT <u>P</u> SGWAAASDSRKGGE <u>P</u> AGY                                                                       |

**SUPPLEMENTAL FIGURE. Alignment of the GGT sequences from human, pig, rat and mouse.** The amino acids in the human sequence that are highlighted in red are the same in rat, mouse and pig but different in human. Amino acids in the human sequence that differ from all others are underlined. The black arrow identifies the cleavage site at which the small subunit is released from the large subunit.
